# Supplementary material for: A variable step-size gradient adaptive lattice algorithm for multiple sinusoidal interference cancelation
Source: Springer Nature journal article supplement (doi:10.1186/1687-6180-2013-106), 2013-05-16

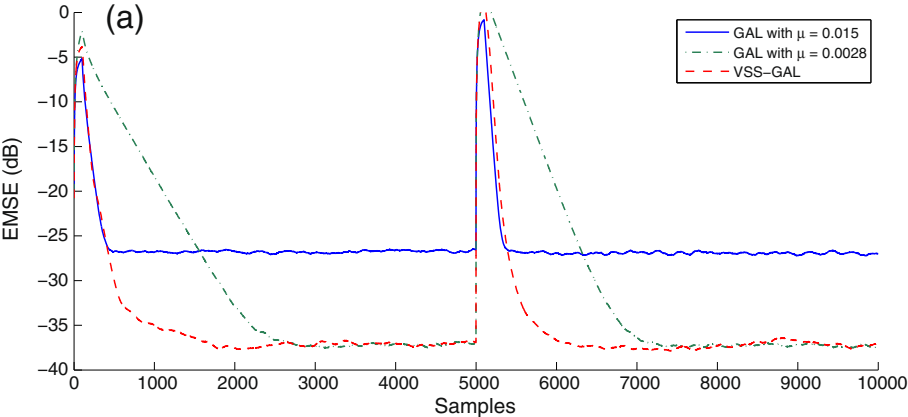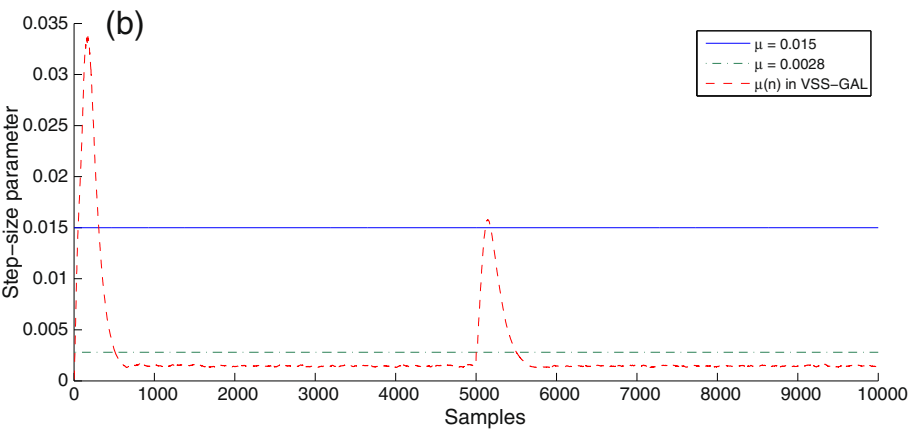

Supplement: 13634_2012_487_MOESM3_ESM.pdf [file 13634_2012_487_MOESM3_ESM.pdf]
